# Supplementary material for: On-line pre-column FRAP-based antioxidant reaction coupled with HPLC-DAD-TOF/MS for rapid screening of natural antioxidants from different parts of Polygonum viviparum
Source: Royal Society of Chemistry journal article supplement (doi:10.1039/d2ra08247k), 2023-01-01
Supplement: d2ra08247k1.pdf [file d2ra08247k1.pdf]

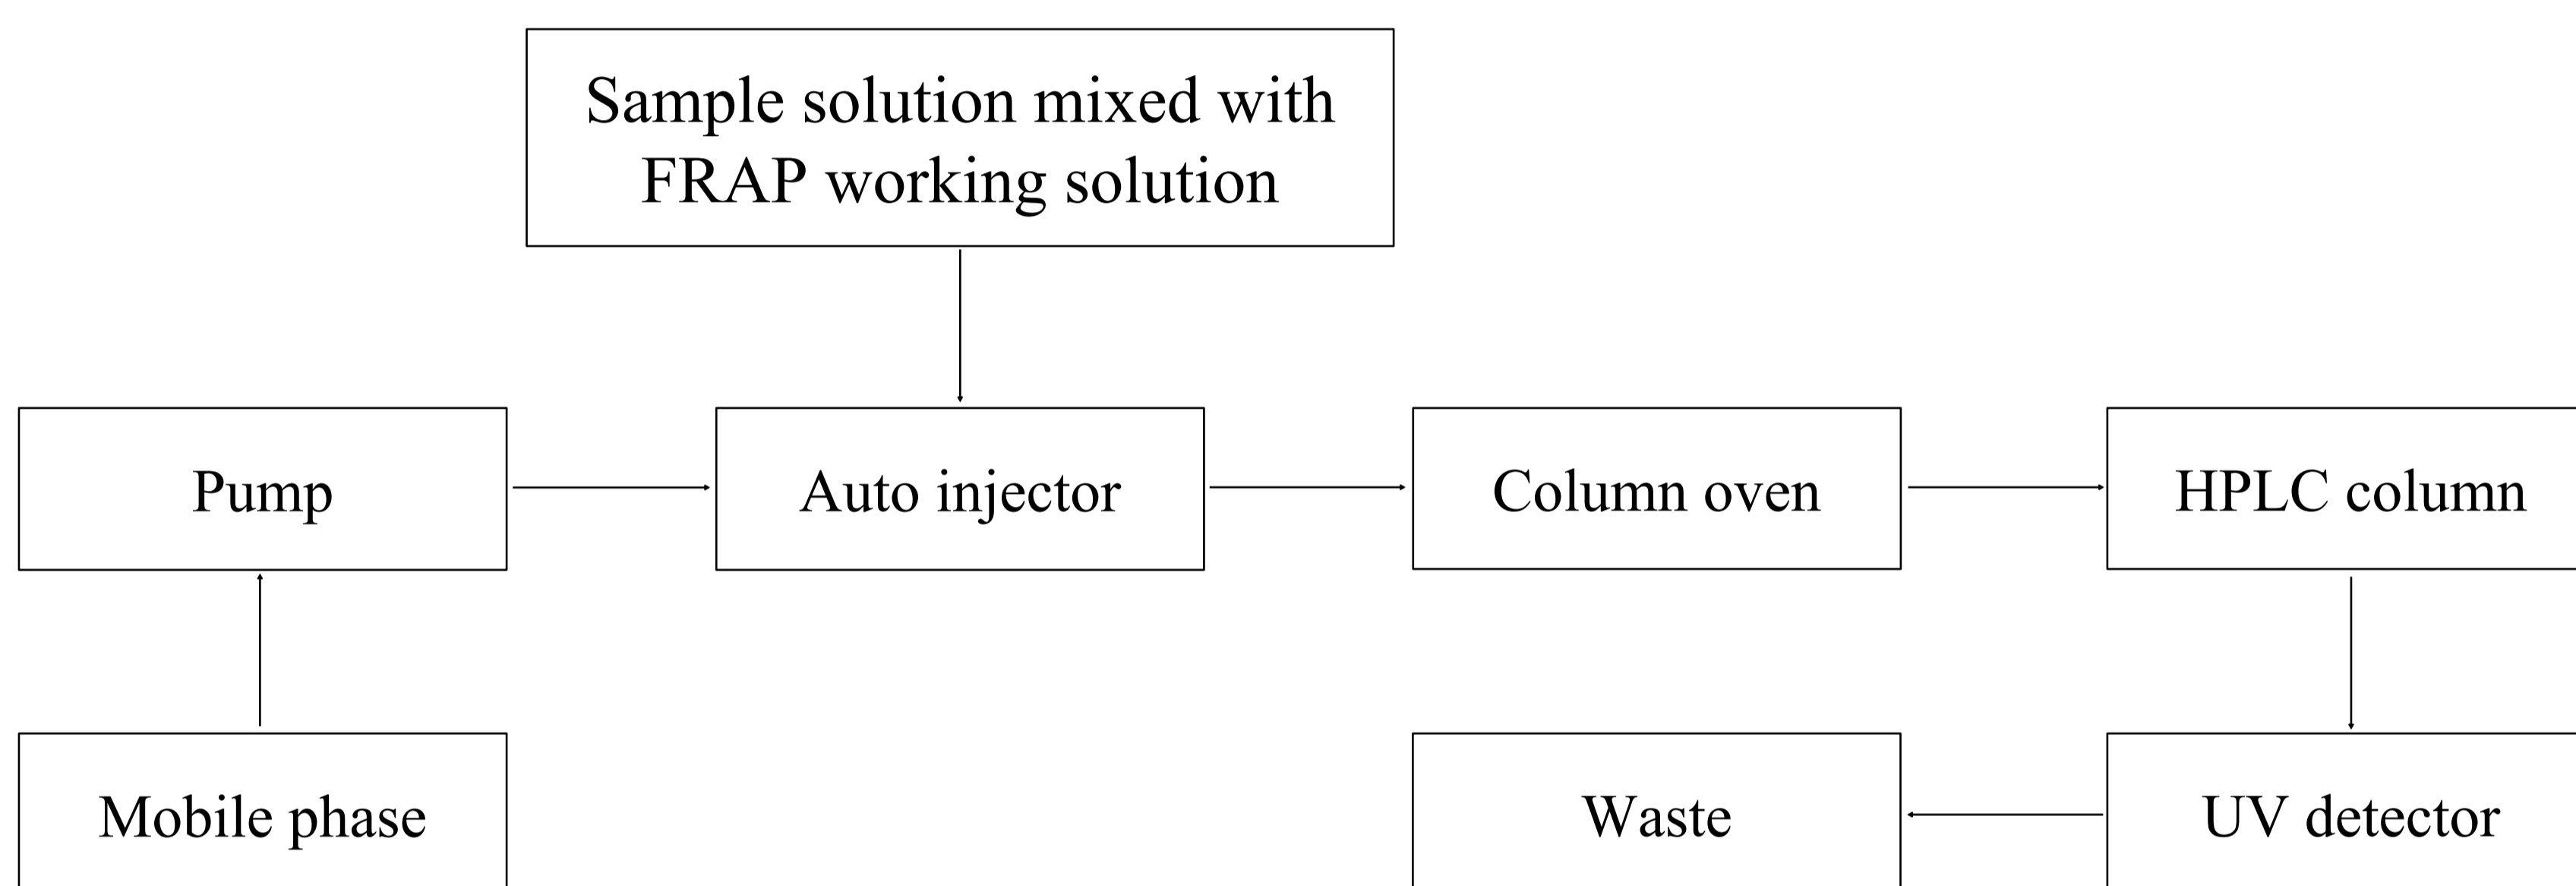

Figure S1. The schematic diagram of the online pre-column FRAP-HPLC screening system

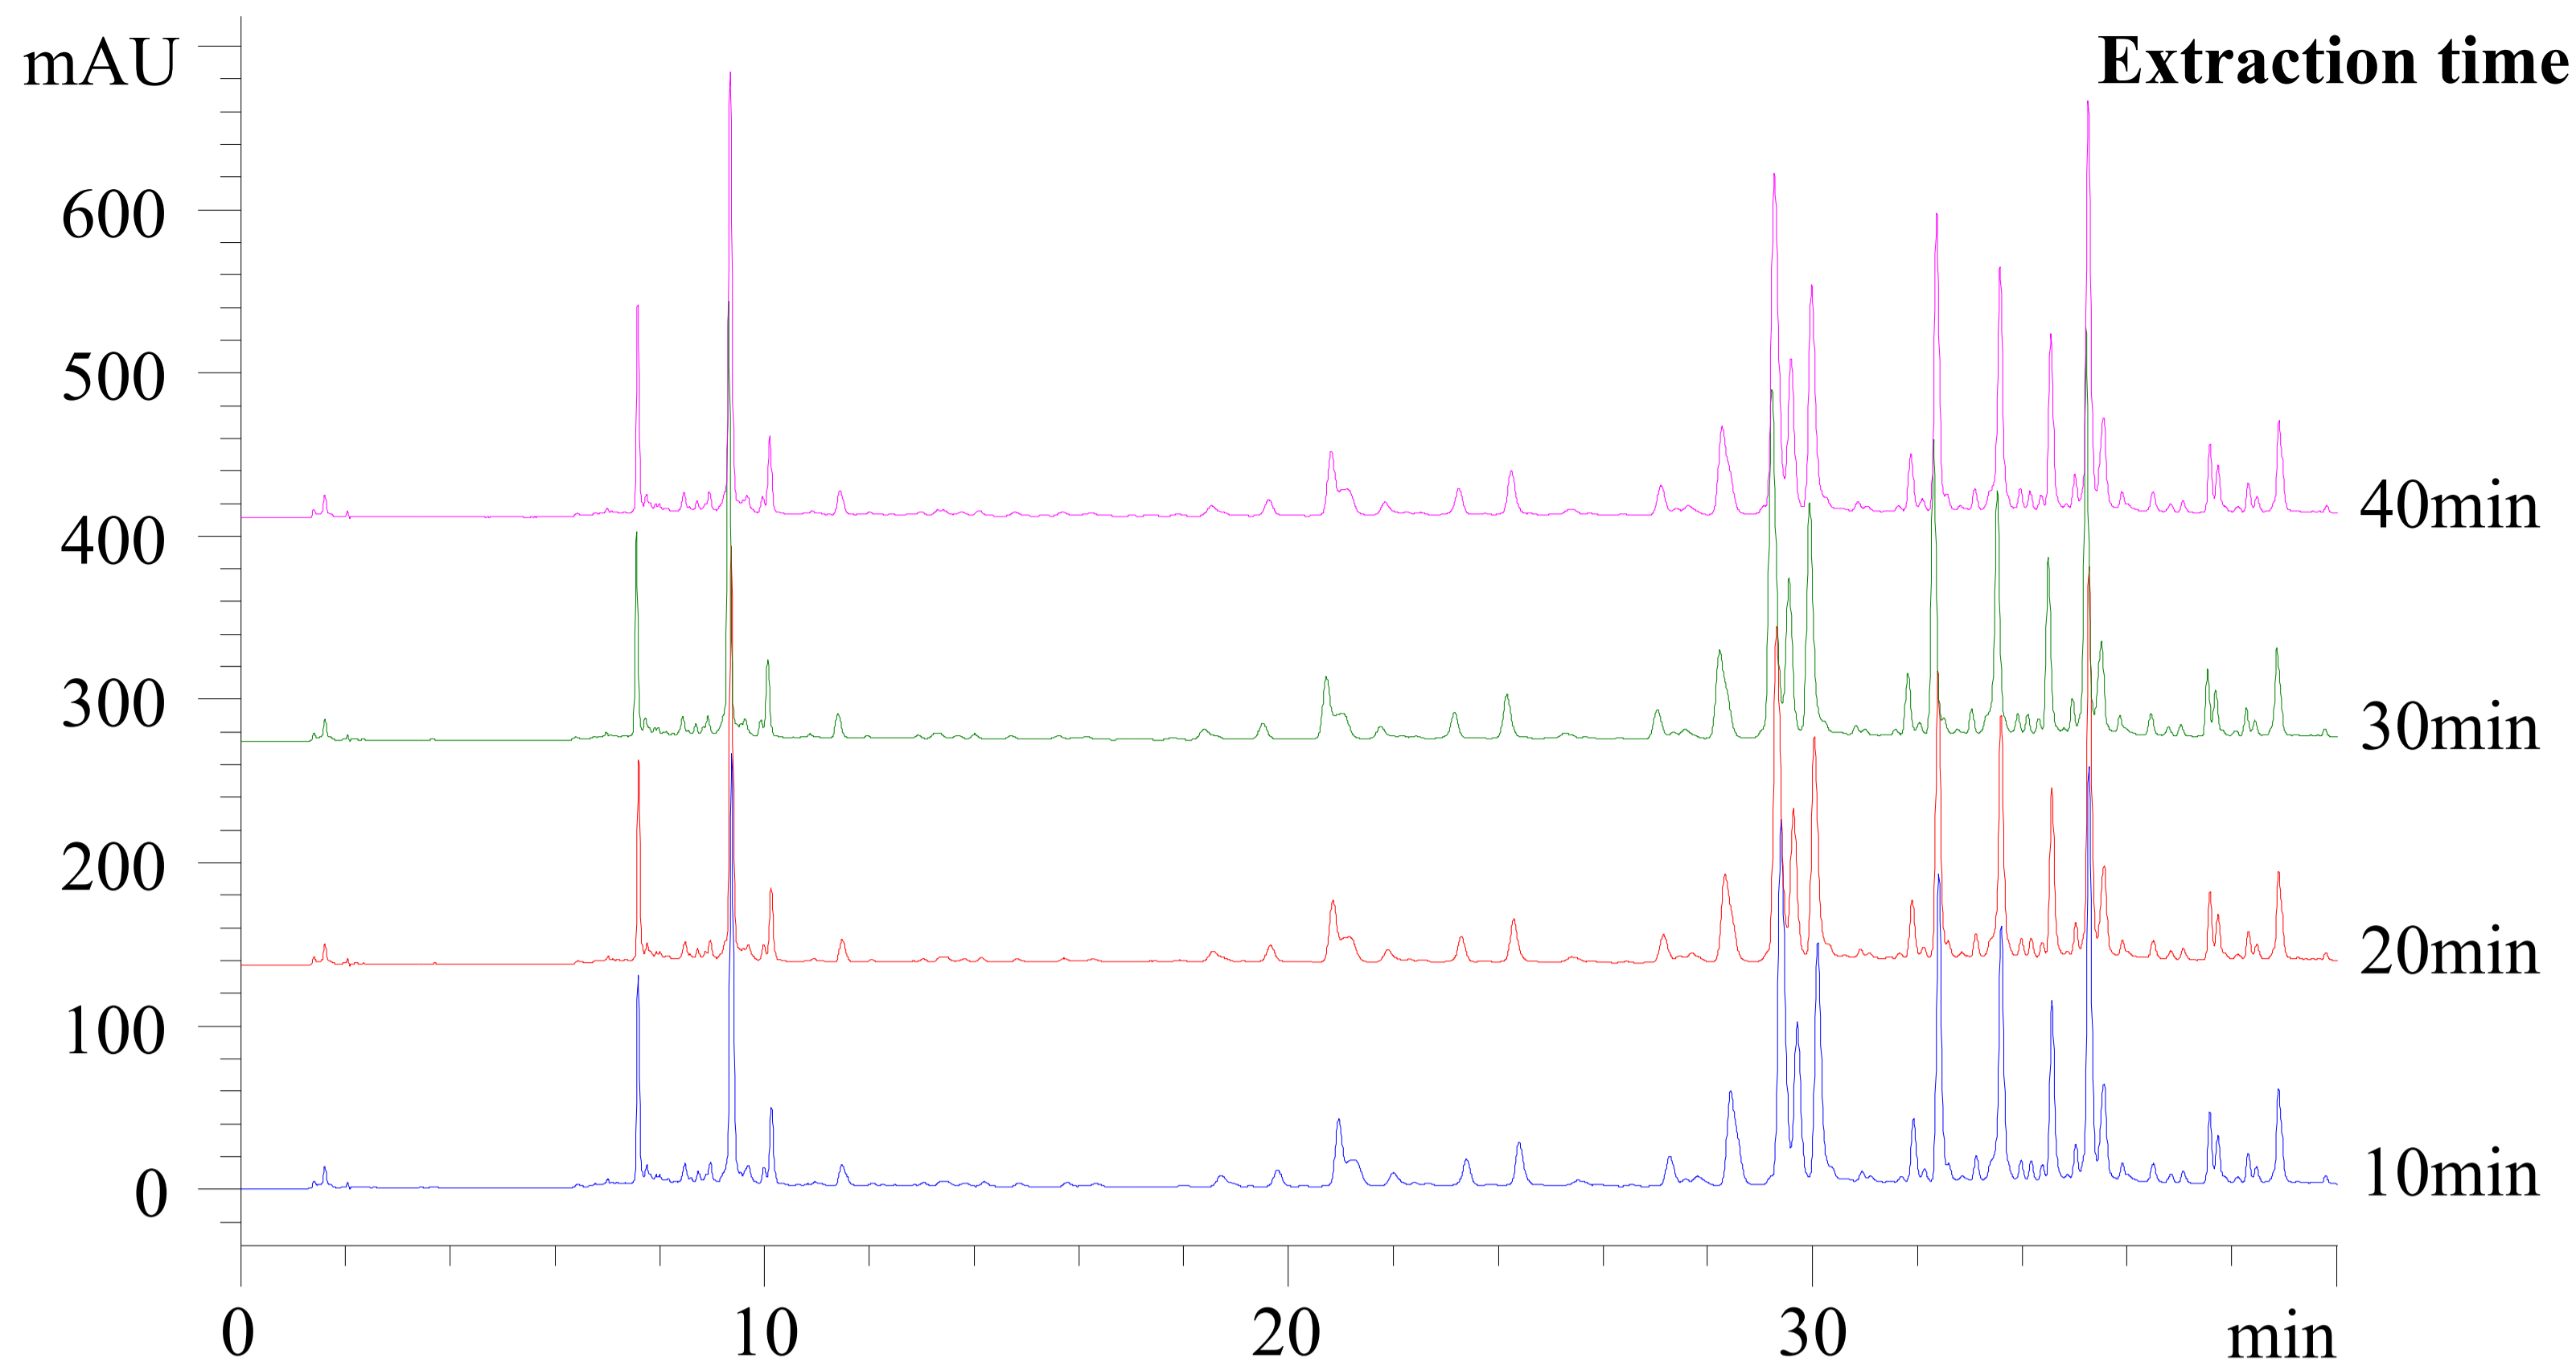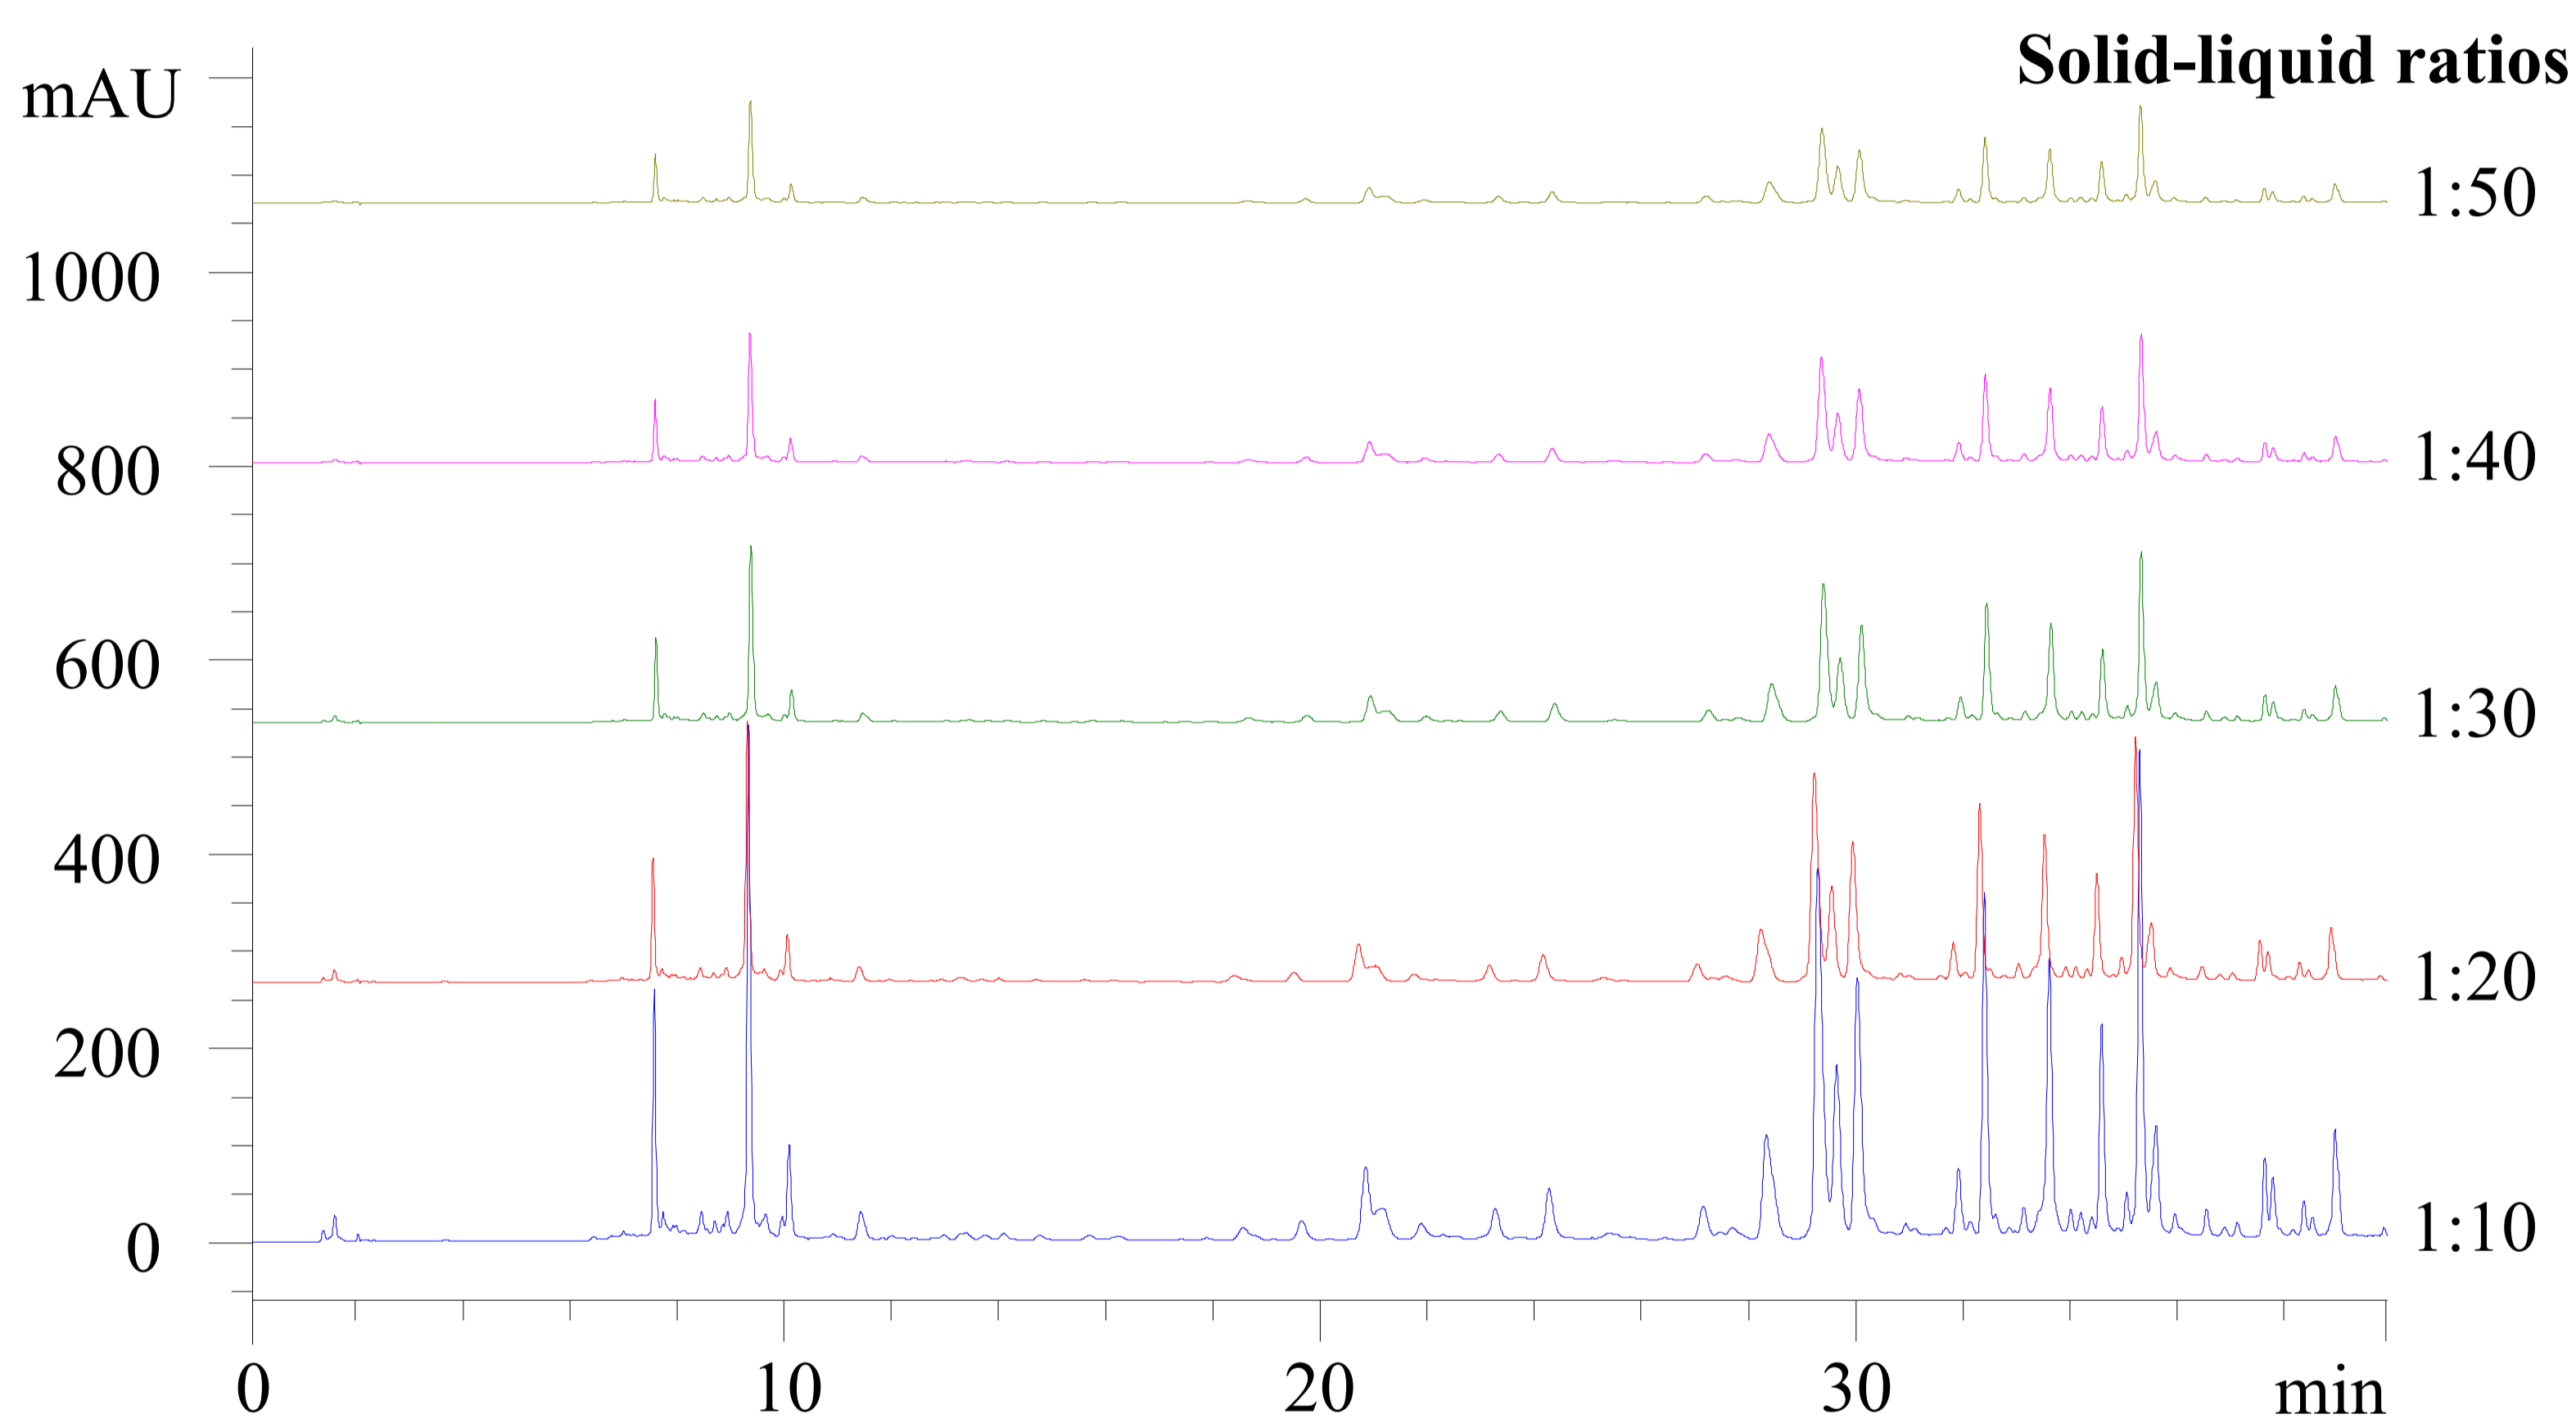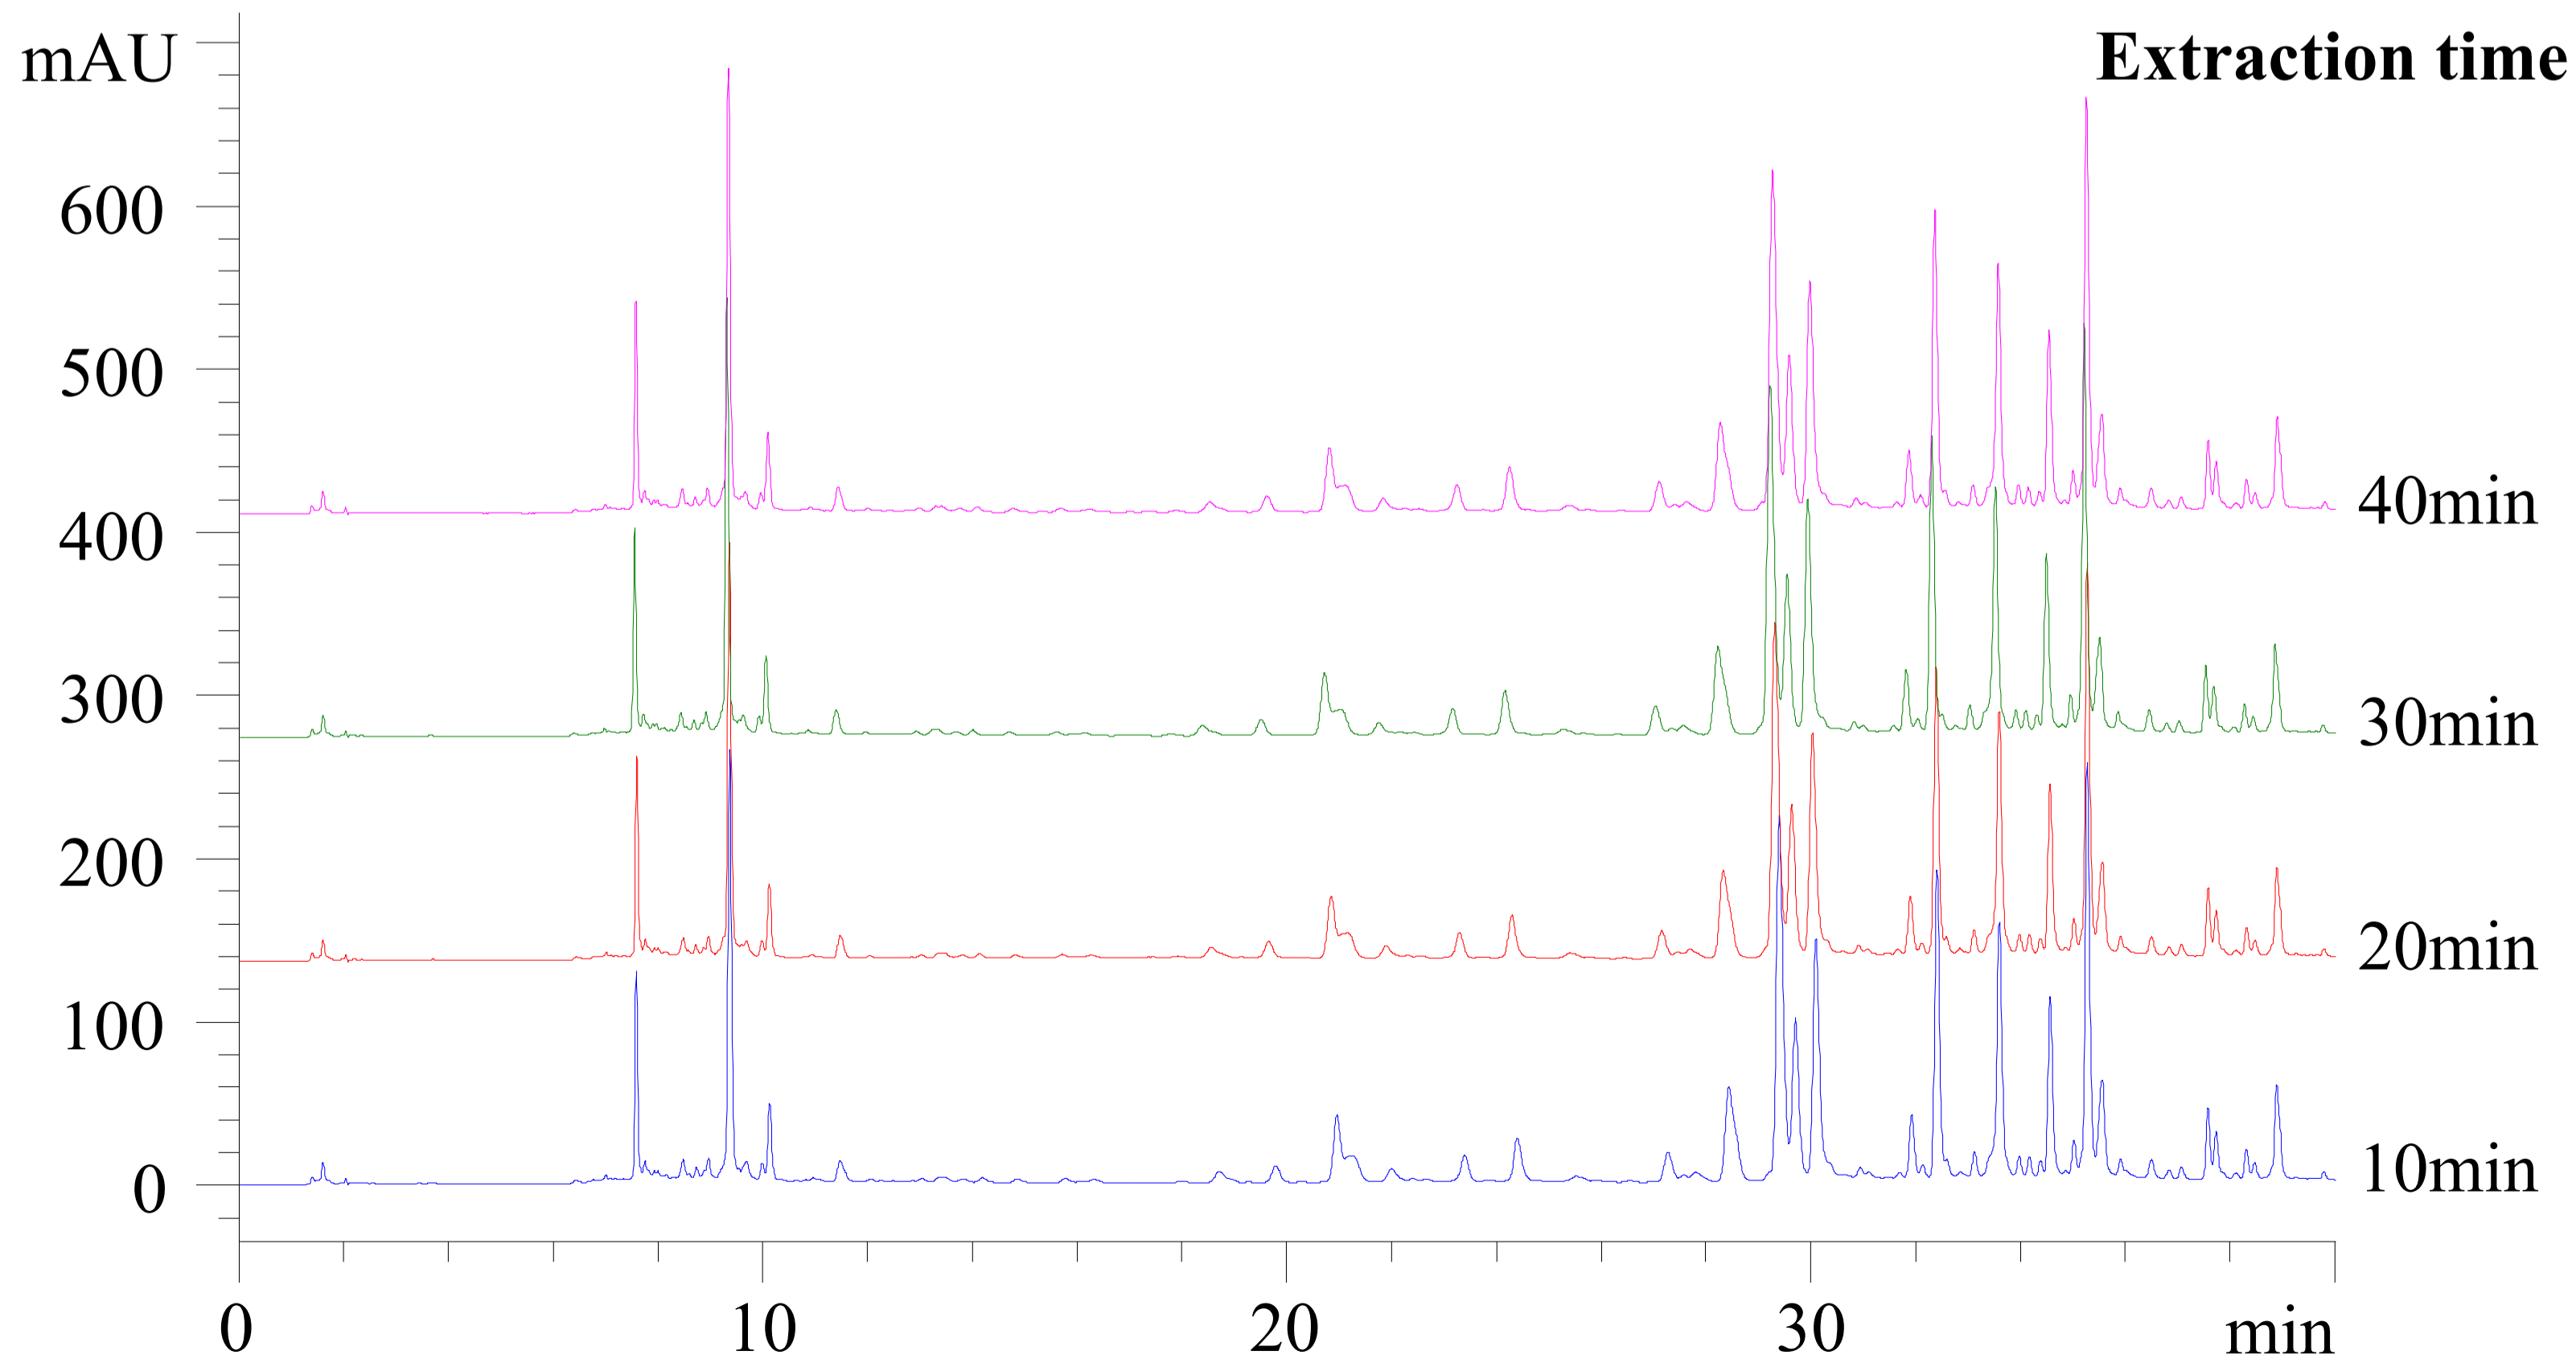

Figure S2. The results of UAE optimization

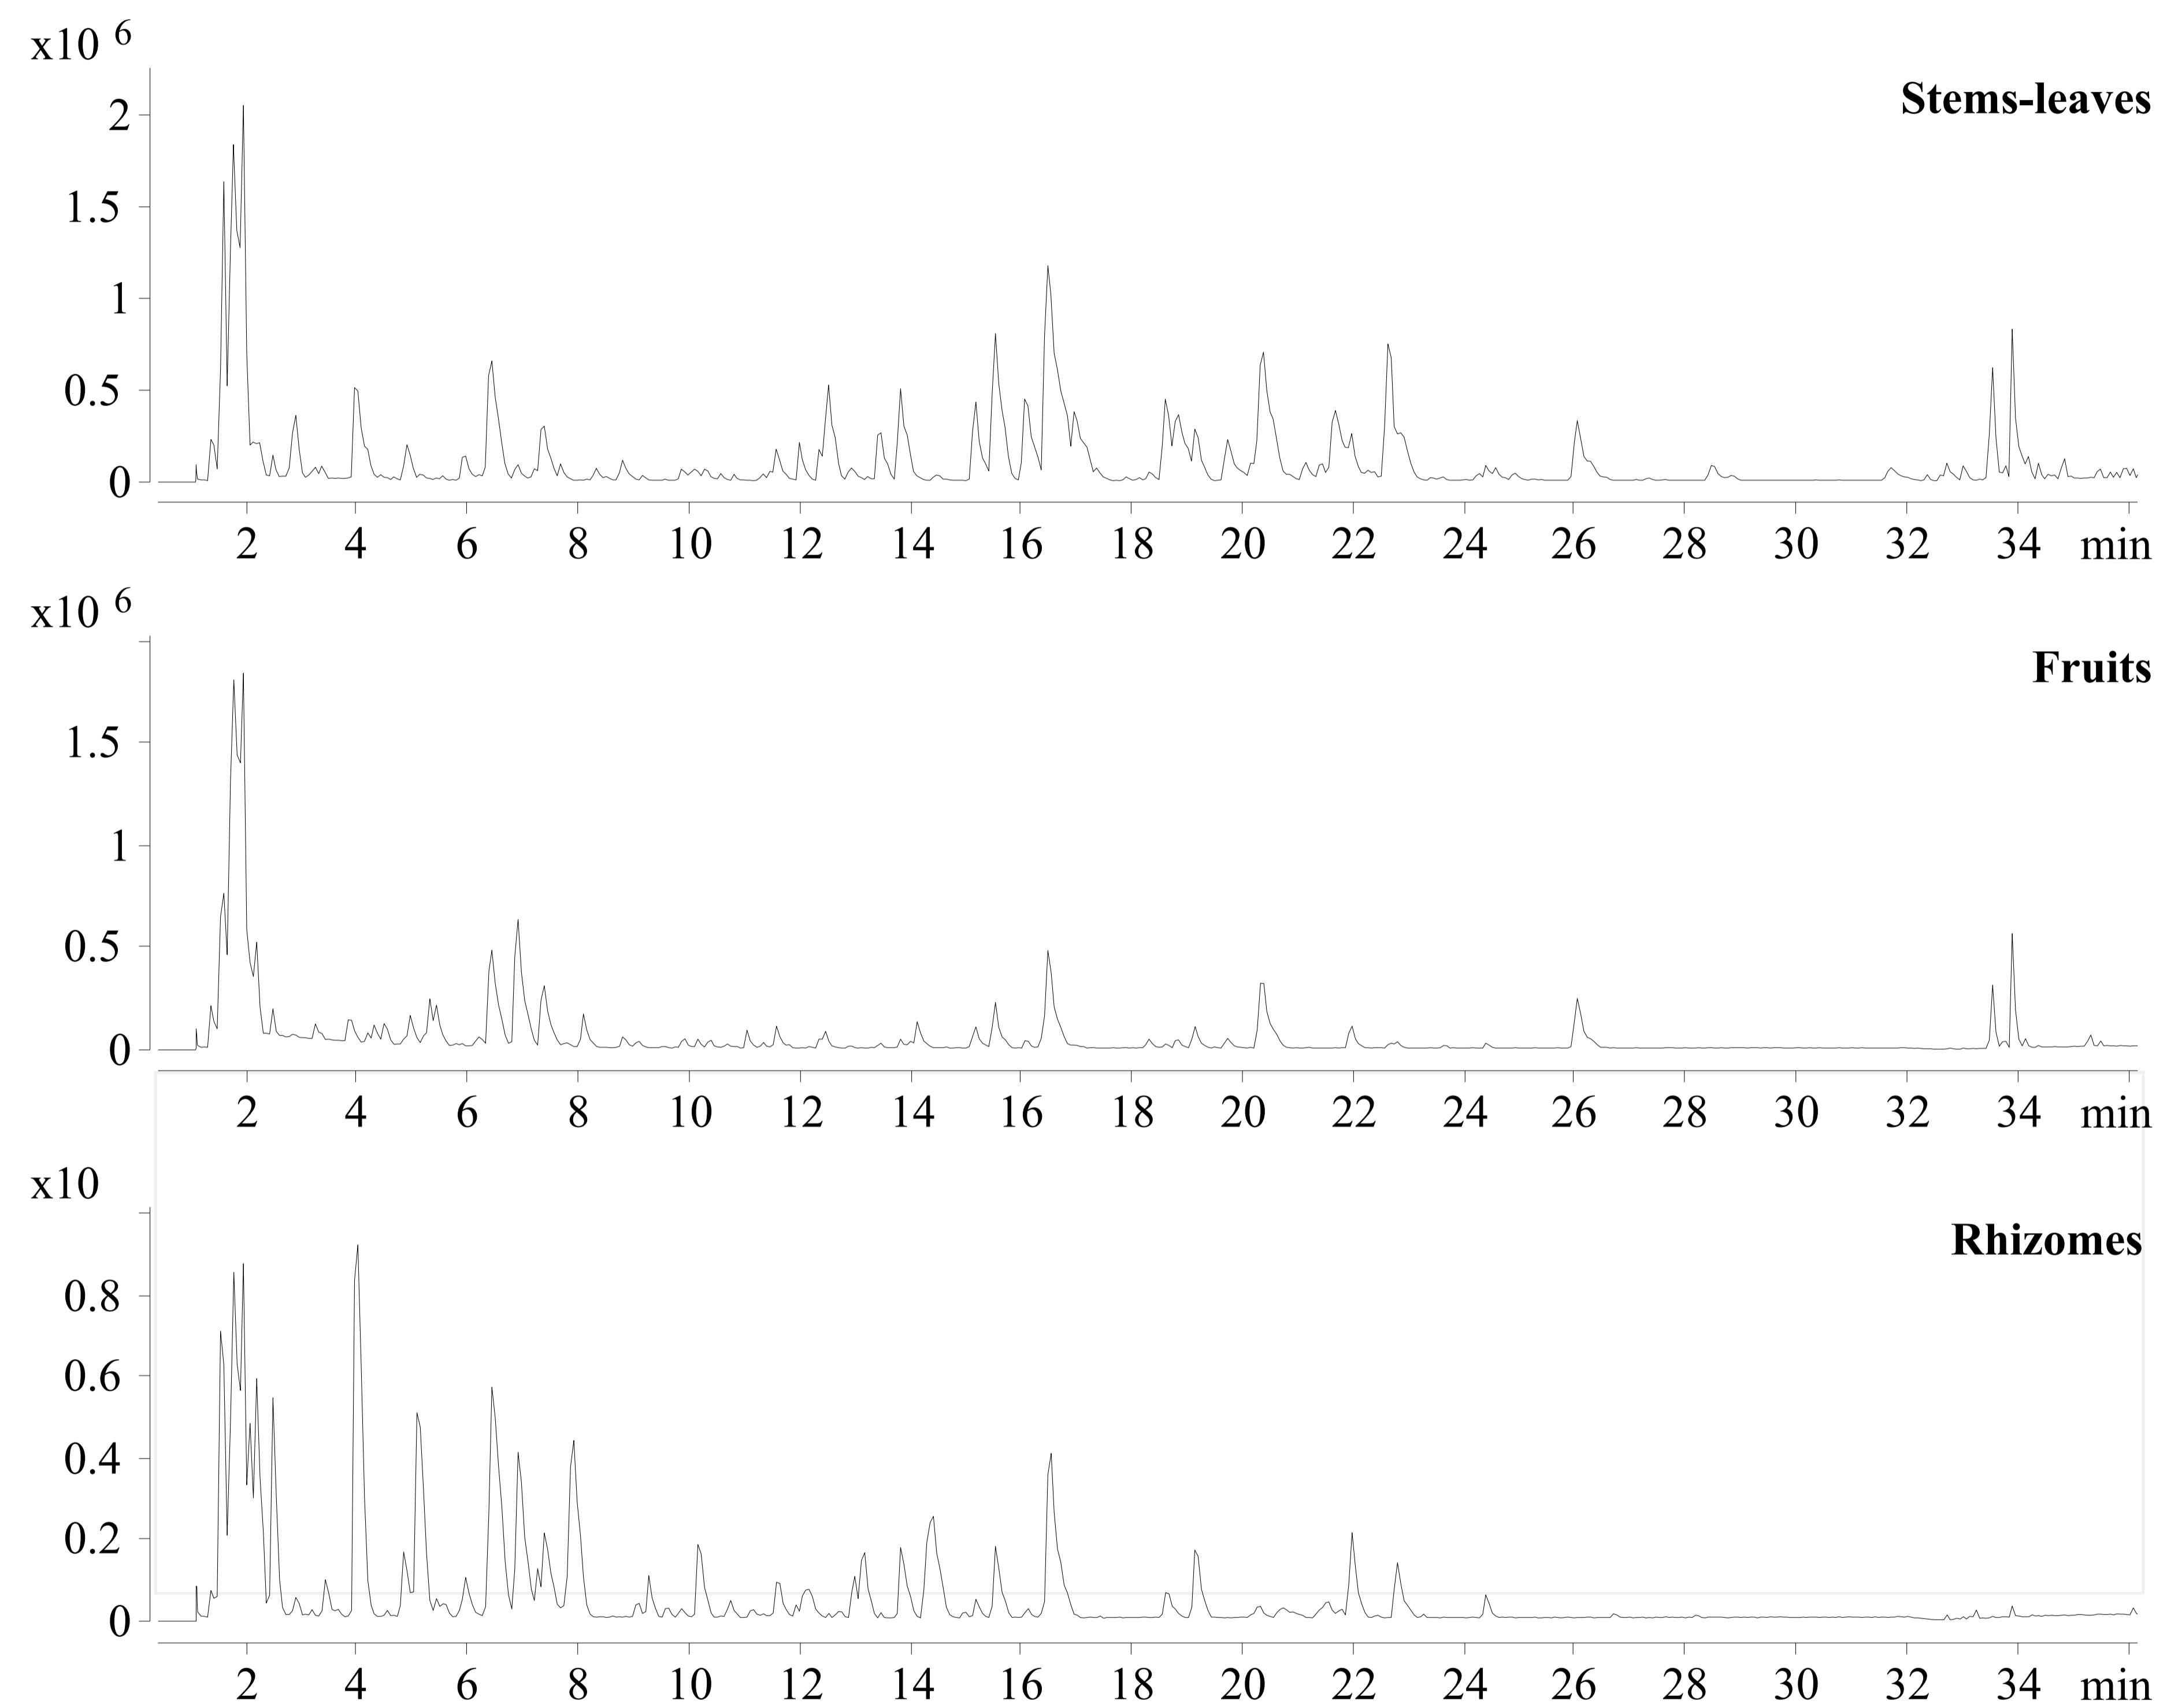

Figure S3. The base peak chromatograms of samples
